# Supplementary material for: Nest characteristics and composition of the colonial nesting Azure-winged magpie Cyanopica cyanus in South Korea
Source: PeerJ journal article supplement (doi:10.7717/peerj.13637), 2022-06-29

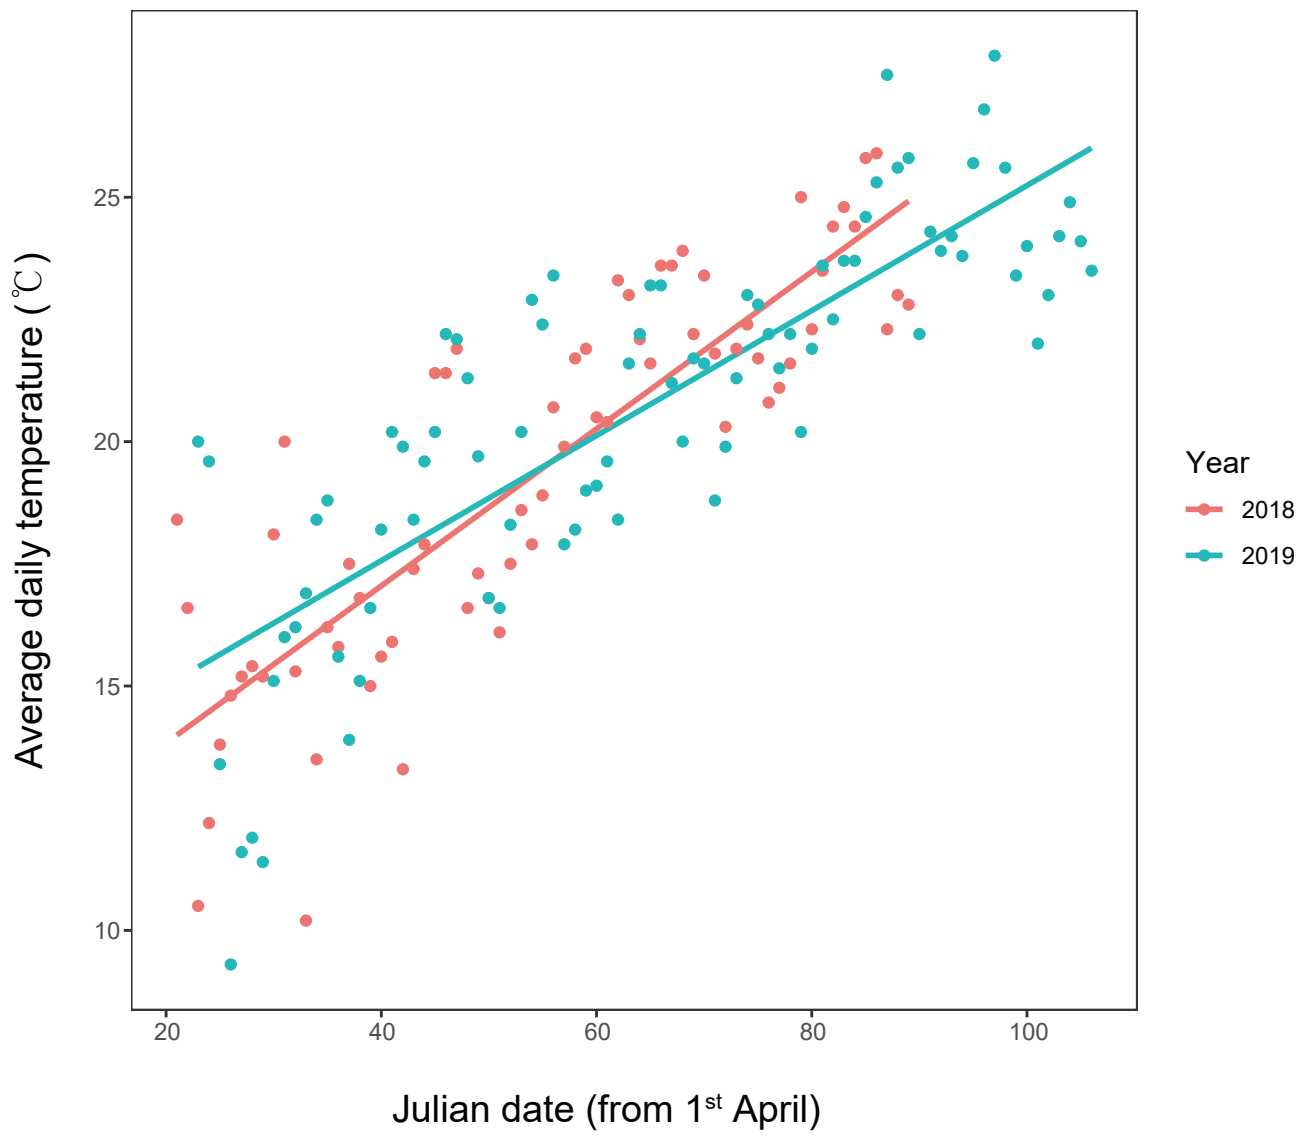

Supplement: Appendix_1.pdf [file Appendix_1.pdf]
