# Supplementary material for: Nest characteristics and composition of the colonial nesting Azure-winged magpie Cyanopica cyanus in South Korea
Source: PeerJ. 2022 Jun 29;10:e13637. doi: 10.7717/peerj.13637 (PMC9250309; doi:10.7717/peerj.13637)
Supplement: Supplemental Information 3 [file peerj-10-13637-s003.xlsx]

## Sheet: Breeding performance
Nest code	Year	Site	Laying date	Clutch size	Brood size	Breeding success or failure	predation date	etc
AWM1	2018	s2	2018-05-02	7	7	Success
AWM2	2018	s2	2018-05-07	7	7	Success
AWM3	2018	s1	2018-05-01	8	8	Success
AWM4	2018	s1	2018-04-23	8	8	Success
AWM5	2018	s1	2018-05-12	8	8	Success
AWM6	2018	s1	2018-05-06	6	6	Success
AWM7	2018	s1	2018-05-10	8	8	Success
AWM8	2018	s1	2018-05-06	7	7	Failure	2018-06-07	nestling
AWM9	2018	s1	2018-05-08	6	5	Success
AWM10	2018	s2	2018-05-30	7	7	Failure	2018-06-28	nestling
AWM11	2018	s2	2018-04-28	8	6	Success
AWM12	2019	s2	2019-05-01	7	7	Success
AWM13	2019	s2	2019-05-05	6	3	Success
AWM14	2019	s1	2019-04-23	6	4	Success
AWM15	2019	s1	2019-04-29	7	7	Success
AWM16	2019	s1	2019-05-01	8	3	Failure	2019-05-29	nestling
AWM17	2019	s1	2019-04-25	7	7	Success
AWM18	2019	s1	2019-05-06	7	6	Success
AWM19	2019	s1	2019-05-05	7	5	Failure	2019-05-29	nestling
AWM20	2019	s1	2019-05-06	8	-	Failure	2019-05-20	egg
AWM21	2019	s1	2019-05-11	8	8	Success
AWM22	2019	s1	2019-05-06	6	4	Failure	2019-06-03	nestling
AWM23	2019	s2	2019-05-11	7	6	Success
AWM24	2019	s2	2019-05-08	7	7	Success
AWM25	2019	s1	2019-05-25	8	8	Success
AWM26	2019	s1	2019-06-11	6	6	Success
AWM27	2019	s2	2019-06-08	6	6	Failure	2019-06-27	nestling

## Sheet:  Nest Dimensions
Nest code	Nest mass (g)	Cup mass (g)	Outer mass (g)	Nest diameter perpendicular to long axis (mm)	Nest diameter perpendicular to long axis (mm)	Cup diameter parallel to long axis (mm)	Cup diameter perpendicular to long axis (mm)	Nest height (mm)	Cup height (mm)	Cup wall thickness (mm)	Cup base thickness (mm)	Outer wall thickness (mm)	Outer base thickness (mm)	Maximum cup depth (mm)	Cup volume (cm3)
AWM1	279.09	25.62	253.47	372	238	181	166	95	64	26	23	95.5	31	41	295
AWM2	310.52	50.68	259.84	347	241	183	157	91	57	-	27	82	34	-	-
AWM3	285.02	46.54	238.48	327	231	213	151	98	67	31	26	57	31	41	323
AWM4	376.37	70.18	306.19	357	267	210	168	103	73	31	25	73.5	33	48	330
AWM5	236.15	47.56	188.59	334	264	174	143	91	66	27	19	80	25	47	305
AWM6	248.03	27.25	220.78	392	324	199	166	87	58	33	17	96.5	29	41	325
AWM7	430.85	84.15	346.7	434	335	198	162	106	77	42	23	118	29	54	380
AWM8	205.62	54.07	151.55	383	245	198	187	94	66	25	22	92.5	28	44	345
AWM9	167.63	22.75	144.88	273	217	193	147	91	53	28	12	40	38	41	305
AWM10	197.91	16.77	181.14	310	268	161	124	84	52	27	17	74.5	32	35	143
AWM11	319.96	42.72	277.24	312	247	219	157	98	67	33	32	46.5	31	35	317
AWM12	467.16	36.97	430.19	300	230	220	168	105	63	43	18	40	42	45	390
AWM13	185.3	13.14	172.16	280	240	173	155	83	51	27	18	53.5	32	33	250
AWM14	479.4	37.16	442.24	510	300	190	148	121	67	35	21	160	54	46	300
AWM15	291.57	31.04	260.53	350	270	192	158	92	63	31	24	79	29	39	295
AWM16	377.37	30.13	347.24	380	240	170	160	108	82	34	24	105	26	58	300
AWM17	313.06	18.51	294.55	330	250	200	155	110	53	28	21	65	57	32	300
AWM18	365.29	16.03	349.26	360	290	220	170	91	53	34	11	70	38	42	410
AWM19	282.55	24.46	258.09	340	280	200	180	106	74	36	20	70	32	54	430
AWM20	226.94	19.16	207.78	330	260	190	150	96	63	38	16	70	33	47	290
AWM21	318.42	29.71	288.71	280	250	185	170	124	48	23	18	47.5	76	30	250
AWM22	373.34	20.52	352.82	320	270	180	148	132	75	37	11	70	57	64	300
AWM23	227.33	17.25	176.75	280	240	185	135	89	54	21	11	47.5	35	43	320
AWM24	200.2	51.56	178.56	340	270	192	170	79	53	28	19	74	26	34	290
AWM25	262.44	24.74	237.7	370	265	178	163	110	59	35	13	96	51	46	225
AWM26	264.17	13.11	251.06	352	240	149	140	94	94	18	25	101.5	46	23	132
AWM27	463.13	29.01	434.12	400	330	181	160	125	53	31	13	109.5	72	40	200

## Sheet: Nest Composition
Nest code	Nest branch (g)	Cup branch (g)	Outer branch (g)	Nest moss (g)	Cup moss (g)	Outer moss (g)	Nest fiber (g)	Cup fiber (g)	Outer fiber (g)	Nest plastic (g)	Cup plastic (g)	Outer plastic (g)	Nest soil (g)	Cup soil (g)	Outer soil (g)	Nest etc. (g)	Cup etc. (g)	Outer etc. (g)
AWM1	81.87	2.14	79.73	36.66	9.83	26.83	12.22	11.8	0.42	2.34	1.25	1.09	142.26	0	142.26	3.74	0.6	3.14
AWM2	98.37	1.64	96.73	61.9	32.53	29.37	16.21	15.7	0.51	2.29	0.47	1.82	130.58	0	130.58	1.17	0.34	0.83
AWM3	58.35	2.36	55.99	32.54	18.63	13.91	22.84	22.69	0.15	7.25	2.81	4.44	159.29	0	159.29	0.15	0.05	0.1
AWM4	83.51	4.27	79.24	67.81	40.79	27.02	21.67	21.34	0.33	20.71	3.66	17.05	195.95	0	195.95	0.69	0.12	0.57
AWM5	60.8	1.01	59.79	51.15	28.92	22.23	17.01	16.82	0.19	2.09	0.54	1.55	104.77	0	104.77	0.33	0.27	0.06
AWM6	104.31	1	103.31	13.93	6.09	7.84	20.17	19.61	0.56	2.34	0.15	2.19	117.11	0	117.11	1.17	0.4	0.77
AWM7	65.54	2.41	63.13	117.2	47.22	69.98	34.46	34.04	0.42	6.88	0.33	6.55	205.12	0	205.12	3.1	0.15	2.95
AWM8	52.9	2.27	50.63	46.92	38.09	8.83	13.5	13.27	0.23	1.24	0.42	0.82	90.01	0	90.01	1.05	0.02	1.03
AWM9	28.46	1.53	26.93	19.44	8.55	10.89	11.75	11.18	0.57	5.99	1.08	4.91	101.31	0	101.31	2.12	0.41	1.71
AWM10	57.87	1.01	56.86	22.33	11.82	10.51	3.55	3.48	0.07	4.07	0.16	3.91	111.35	0	111.35	1.74	0.3	1.44
AWM11	39.23	2.56	36.67	36.29	15.24	21.05	24.47	24.4	0.07	2.45	0.22	2.23	211.44	0	211.44	6.08	0.3	5.78
AWM12	68.9	2.01	66.89	40.11	26.08	14.03	5.81	5.1	0.71	11.17	0.71	10.46	338.03	0	338.03	3.14	3.07	0.07
AWM13	47.98	1.51	46.47	17.2	3.53	13.67	7.51	7.27	0.24	1.1	0.18	0.92	109.82	0	109.82	1.69	0.65	1.04
AWM14	179.01	3.57	175.44	28.26	13.91	14.35	17.6	17.32	0.28	9.45	2.01	7.44	244.7	0	244.7	0.38	0.35	0.03
AWM15	56.46	1.38	55.08	10.34	4.68	5.66	24.66	23.97	0.69	3.23	0.35	2.88	184.96	0	184.96	11.91	0.66	11.25
AWM16	78.69	5.94	72.75	20.03	11.13	8.9	12.4	12.35	0.05	1.56	0.17	1.39	261.11	0	261.11	3.58	0.54	3.04
AWM17	75.35	0.88	74.47	14.72	2.26	12.46	14.67	14.54	0.13	5.34	0.48	4.86	200.38	0	200.38	2.6	0.35	2.25
AWM18	117.5	1.11	116.39	20.35	6.68	13.67	7.71	7.48	0.23	1.44	0.22	1.22	217.41	0	217.41	0.88	0.54	0.34
AWM19	82.07	0.62	81.45	20.33	11.03	9.3	14.83	12.47	2.36	1.16	0.23	0.93	161	0	161	3.16	0.11	3.05
AWM20	85	0.45	84.55	18.25	7.58	10.67	10.9	10.78	0.12	2.16	0.11	2.05	109.28	0	109.28	1.36	0.25	1.11
AWM21	130.65	3.63	127.02	26.98	12.38	14.6	12.66	12.39	0.27	6.38	0.97	5.41	138.63	0	138.63	3.12	0.34	2.78
AWM22	90.59	2.19	88.4	30.35	8.92	21.43	9.9	9.3	0.6	1.64	0.05	1.59	238.4	0	238.4	2.46	0.06	2.4
AWM23	77.21	0.36	76.85	17.33	8.27	9.06	7.86	7.8	0.06	4.38	0.39	3.99	84.37	0	84.37	2.85	0.43	2.42
AWM24	66.97	2.06	64.91	24.69	9.65	15.04	8.43	8	0.43	4.5	1.68	2.82	95.14	0	95.14	0.47	0.25	0.22
AWM25	74.42	1.55	72.87	18.3	10.23	8.07	12.81	12.6	0.21	3.07	0.29	2.78	152.04	0	152.04	1.8	0.07	1.73
AWM26	91.02	0.18	90.84	12.81	6.69	6.12	6.09	6.06	0.03	1.22	0.18	1.04	152.58	0	152.58	0.45	0	0.45
AWM27	128.62	3.72	124.9	40.4	15.18	25.22	8.45	8.21	0.24	13.87	1.66	12.21	270.51	0	270.51	1.28	0.24	1.04
